# Supplementary figures and images for: Thermodynamic and FTIR studies of supercooled water confined to exterior and interior of mesoporous MCM-41
Source: Royal Society of Chemistry journal article supplement (doi:10.1039/b905258e), 2009-01-01

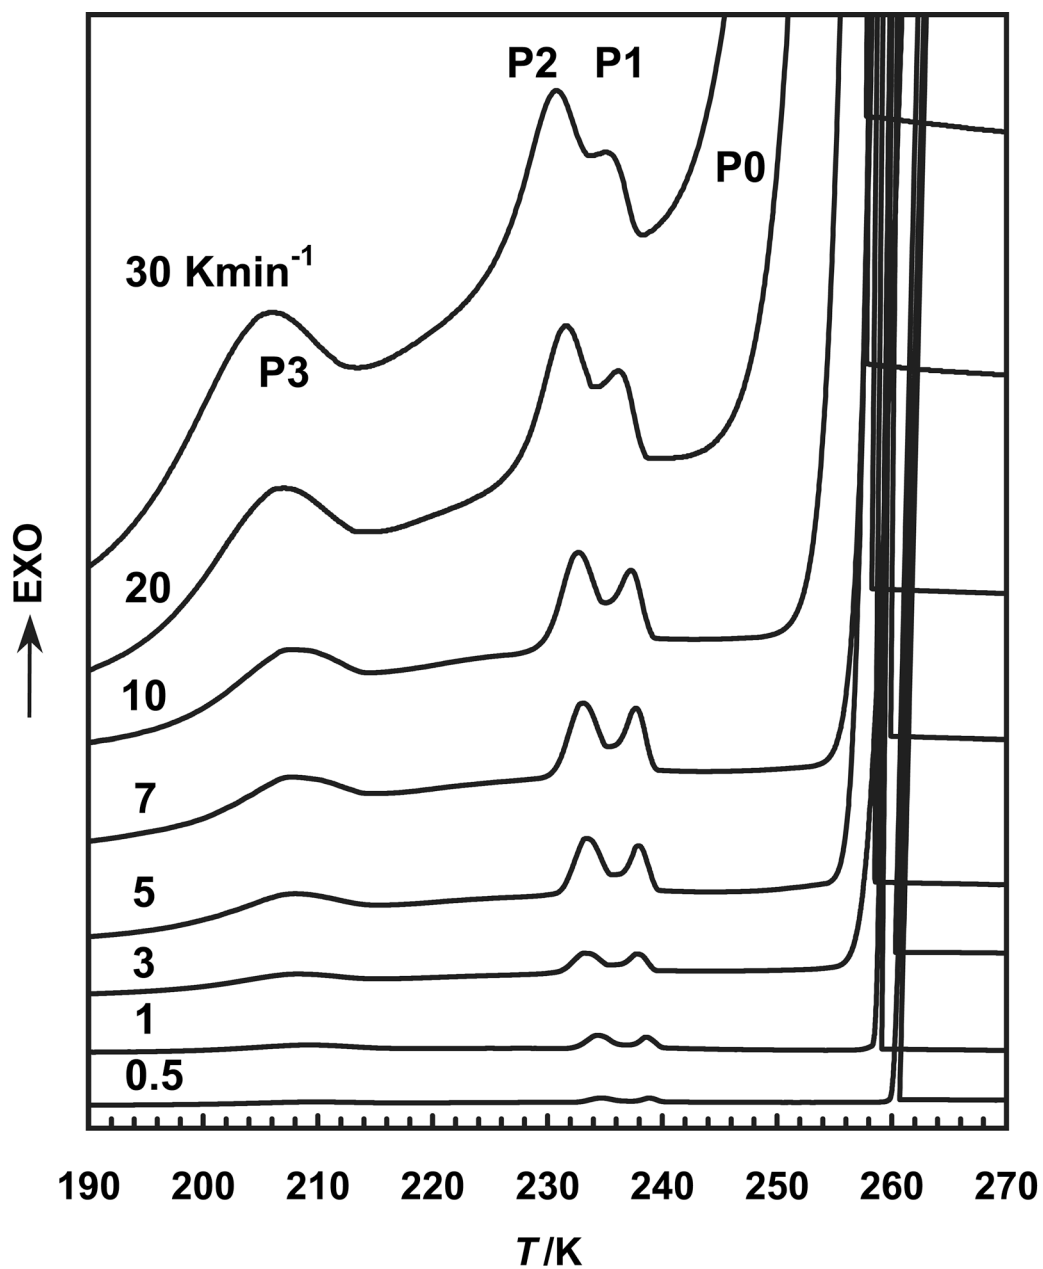

**Supple. Fig. 1. Effect of scanning speed on the DSC curves, MCM-41 C12.**

Supplement: b905258e-1.pdf [file b905258e-1.pdf]

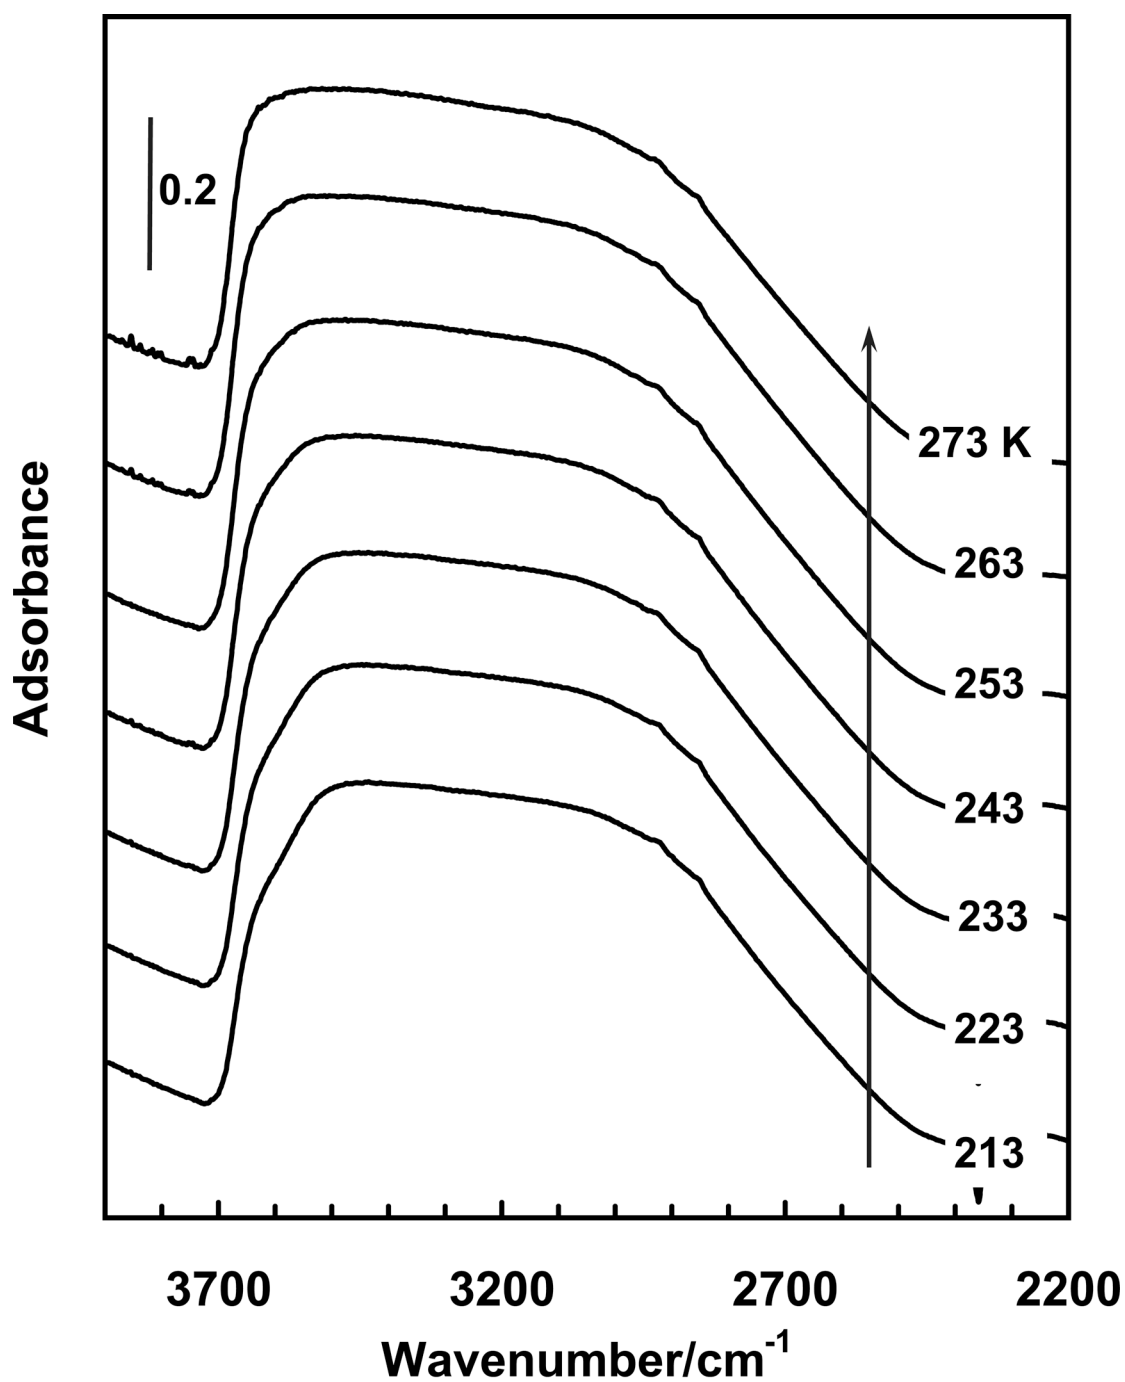

**Supple. Fig. 3. FTIR spectra of water confined in MCM-41 C12 determined at increasing temperatures.**

Supplement: b905258e-3.pdf [file b905258e-3.pdf]
